# Supplementary material for: H5N1 influenza virus-specific miRNA-like small RNA increases cytokine production and mouse mortality via targeting poly(rC)-binding protein 2
Source: PubMed Central journal article supplement (PMC5799819; doi:10.1038/cr.2018.3), 2018-01-12
Supplement: cr20183x6.pdf [file cr20183x6.pdf]

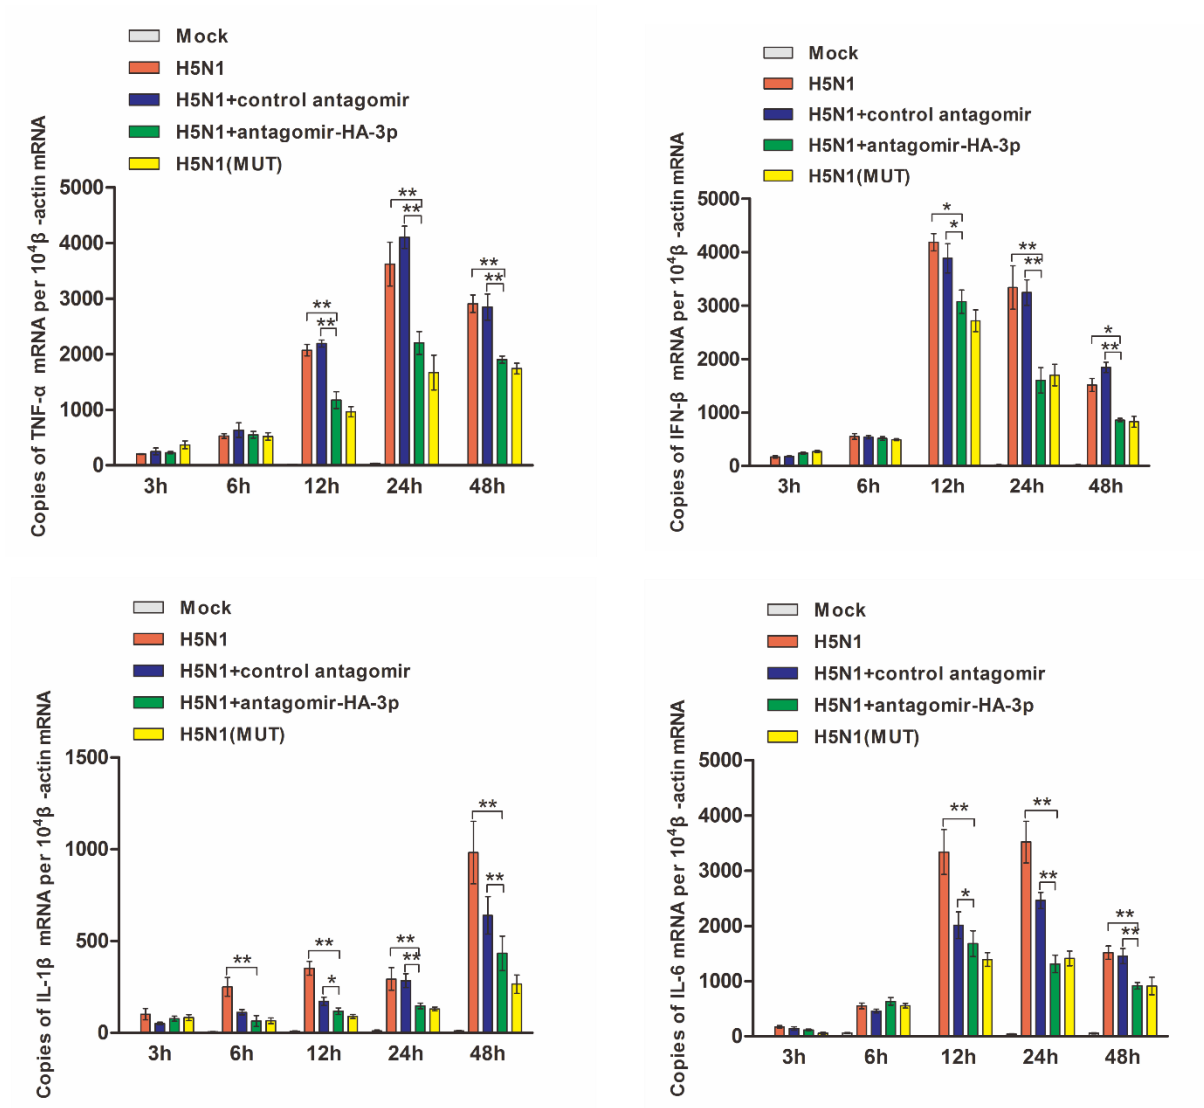

**Supplementary information, Figure S6** Quantitative RT-PCR assay of TNF- $\alpha$ , IFN- $\beta$ , IL-1 $\beta$  or IL-6 mRNA levels in human primary macrophages infected with H5N1 or mutant H5N1 viruses plus different treatments. Data are presented as the mean  $\pm$  SEM (n = 3). The average of triplicate data obtained for each sample was used to calculate the relative change in gene expression after normalization to  $\beta$ -actin mRNA. \*,  $P < 0.05$ . \*\*,  $P < 0.01$ .
